# Supplementary material
Source: publisher figshare collection journal article supplement (https://sage.figshare.com/ndownloader/files/20718276)
Supplement: Supplementary file 1 [file 20718276]

## Supplemental Material

**Supplementary table S1:** The intervention illustrated by main features from the Template from intervention Description and Replication (TIDieR) Checklist and Guide

*Brief name:* Intensive speech and language therapy by videoconference

*Why:* To improve expressive language function in patients with aphasia after stroke

*What:* Intensive speech and language therapy with an emphasis on naming. The therapy will be tailored to the participant's language impairment level and focus on expressive language and everyday communication. Material used in the training will include the Newcastle University Aphasia Therapy Resources (NUMA), a collection of SLP-made tasks for aphasia compiled as *Sareptas afasikrukke* and Lexia (computer-based training program). In addition, text and pictures from the Internet may also be used

*Who provided:* Speech and language pathologists sited at Sunnaas Rehabilitation Hospital. Speech-language pathologists (SLPs) will receive training in how to give intervention by videoconference within the context of a clinical trial

*How:* Using videoconference and remote control software to a laptop at the patient's location

*Where:* From Sunnaas Rehabilitation Hospital to the patient's home or institution, e.g., rehabilitation ward or nursing home

*When/How much:* The experimental intervention consists of 5 h of speech and language therapy a week, over 4 weeks (total dose of 20 h of therapy). Participants with  $\geq 16$  sessions over 32 days will be considered to be per protocol

---

Reproduced from: Øra et al. Trials (2018) 19:208  
<https://doi.org/10.1186/s13063-018-2588-5>

**Table S2: Features of the telerehabilitation intervention and usual care received during the trial**

| <b>Intervention description</b>                                                                                           | <b>Telerehabilitation group n=30</b>                        | <b>Control group n=27</b> |
|---------------------------------------------------------------------------------------------------------------------------|-------------------------------------------------------------|---------------------------|
| <b>Brief name of intervention</b>                                                                                         | Augmented therapy by videoconference and usual care therapy | Usual care therapy        |
| <b>Who provided therapy, n (%):</b>                                                                                       |                                                             |                           |
| Only therapist in municipality                                                                                            | 0                                                           | 16 (59.3 %)               |
| Only therapist in rehabilitation institution                                                                              | 0                                                           | 2 (7.4 %)                 |
| Only therapist in municipality + therapist in rehabilitation institution                                                  | 0                                                           | 9 (33.3 %)                |
| Only project therapist at Sunnaas Rehabilitation Hospital                                                                 | 2 (6.7 %)                                                   | 0                         |
| Project therapist at Sunnaas Rehabilitation Hospital + therapist in municipality                                          | 22 (73.3 %)                                                 | 0                         |
| Project therapist at Sunnaas Rehabilitation Hospital, therapist in municipality + therapist in rehabilitation institution | 6 (20.0 %)                                                  | 0                         |
| <b>Modes of delivery, n (%):</b>                                                                                          |                                                             |                           |
| Only Individual therapy face-to-face                                                                                      | 0                                                           | 16 (59.3 %)               |
| Only Group therapy face-to face                                                                                           | 0                                                           | 1 (3.7 %)                 |
| Individual + group therapy face-to face                                                                                   | 0                                                           | 10 (37.0 %)               |
| Only therapy by videoconference                                                                                           | 2 (6.7 %)                                                   | 0                         |
| Therapy by videoconference + individual therapy face-to-face                                                              | 20 (66.7 %)                                                 | 0                         |
| Therapy by videoconference, individual and group therapy face-to-face                                                     | 8 (26.7 %)                                                  | 0                         |

|                                                                 |             |             |
|-----------------------------------------------------------------|-------------|-------------|
| <b>Therapy dose and location</b>                                |             |             |
| <b>Telerehabilitation intervention</b>                          |             |             |
| Location when receiving telerehabilitation intervention, n (%): |             |             |
| Own home                                                        | 20 (66.7 %) | n/a         |
| Rehabilitation ward/institution                                 | 5 (16.7 %)  | n/a         |
| Own home and rehabilitation ward/institution                    | 5 (16.7 %)  | n/a         |
|                                                                 |             |             |
| Duration of telerehabilitation intervention in days (mean, SD)  | 27.6, 2.4   | 0           |
| Hours of therapy by videoconference (mean, SD)                  | 18.6, 1.5   | 0           |
|                                                                 |             |             |
| <b>Usual care</b>                                               |             |             |
| Location during usual care therapy, n (%):                      |             |             |
| No usual care delivered                                         | 2 (6.7 %)   | 0           |
| Own home                                                        | 3 (10.0 %)  | 3 (11.1 %)  |
| Rehabilitation ward/institution                                 | 1 (3.3 %)   | 2 (7.4 %)   |
| The therapist's office                                          | 18 (60.0 %) | 14 (51.9 %) |
| The therapist's office and rehabilitation institution           | 6 (20.0 %)  | 8 (29.6 %)  |

|                                                                 |            |            |
|-----------------------------------------------------------------|------------|------------|
| <b>Hours of Usual care therapy :</b>                            |            |            |
| Usual care therapy individually (mean, SD)                      | 17.9, 11.4 | 19.0, 10.1 |
| Usual care therapy by group (mean, SD)                          | 2.6, 5.3   | 6.0, 9.6   |
| Usual care therapy in total (mean, SD)                          | 20.4, 12.0 | 25.0, 13.8 |
| <b>Total hours of therapy received</b>                          |            |            |
| Telerehabilitation Intervention + Usual care therapy (mean, SD) | 39.0, 12.2 | 25.0, 13.8 |

n/a= not applicable

**Table S3: Form return rates, data completeness and time between assessments**

|                                                                   | <b>Telerehabilitation group</b> | <b>Control group</b> |
|-------------------------------------------------------------------|---------------------------------|----------------------|
| <b>Norwegian Basic Aphasia Assessment, n (%)</b>                  |                                 |                      |
| Baseline                                                          | 32 (100 %)                      | 30 (100 %)           |
| 4 weeks assessment                                                | 30 (94 %)                       | 27 (90 %)            |
| 4 months assessment                                               | 29 (91 %)                       | 27 (90 %)            |
| <b>Verb and Sentence Test, subtest sentence production, n (%)</b> |                                 |                      |
| Baseline                                                          | 32 (100 %)                      | 30 (100 %)           |
| 4 weeks assessment                                                | 30 (94 %)                       | 27 (90 %)            |
| 4 months assessment                                               | 28 (88 %)                       | 27 (90 %)            |
| <b>Communicative Effectiveness Index, n (%)</b>                   |                                 |                      |
| 4 weeks assessment                                                | 28 (88 %)                       | 25 (83 %)            |
| 4 months assessment                                               | 24 (75 %)                       | 22 (73 %)            |
| <b>Time between assessments (mean, SD)</b>                        |                                 |                      |
| From baseline to 4 weeks assessment (days)                        | 36.2, 5.9                       | 31.2, 3.6            |
| From baseline to 4 months assessment (weeks)                      | 17.3, 1.6                       | 16.8, 0.95           |

Supplementary table S4: Results of language outcomes using linear mixed models analysis with covariates

| Outcome variable                 | Baseline,<br>mean (SD) | 4 weeks<br>assessment,<br>mean (SD) | 4 months FU,<br>mean (SD) | Telerehab group 4<br>weeks<br>Effect estimate<br>(95% CI) | Telerehab group FU<br>Effect estimate<br>(95% CI) | Time*group 4 weeks<br>Effect estimate<br>(95% CI) | Time*group FU<br>Effect estimate<br>(95% CI) | P value<br>Time*group<br>covariates |
|----------------------------------|------------------------|-------------------------------------|---------------------------|-----------------------------------------------------------|---------------------------------------------------|---------------------------------------------------|----------------------------------------------|-------------------------------------|
| <b>NGA subtest naming</b>        |                        |                                     |                           |                                                           |                                                   |                                                   |                                              |                                     |
| Telerehabilitation group         | 38.9 (13.7)            | 47.3 (18.9)                         | 50.4 (22.4)               | 8.7 (5.3 – 12.1)                                          | 11.7 (7.3 – 16.0)                                 | - 3.0 (-7.9 – 1.9)                                | -2.0 (-8.3 – 4.3)                            | 0.479                               |
| Control group                    | 45.0 (17.6)            | 50.2 (23.3)                         | 54.1 (24.9)               |                                                           |                                                   |                                                   |                                              |                                     |
| <b>NGA subtest repetition</b>    |                        |                                     |                           |                                                           |                                                   |                                                   |                                              |                                     |
| Telerehabilitation group         | 41.4 (21.2)            | 47.2 (22.6)                         | 53.0 (25.8)               | 7.3 (3.9 – 10.6)                                          | 13.6 (8.7 – 18.5)                                 | -2.6 (-7.5 – 2.3)                                 | -9.1 (-16.2 – -1.9)                          | <b>0.023</b>                        |
| Control group                    | 52.7 (24.4)            | 58.6 (25.2)                         | 58.4 (23.4)               |                                                           |                                                   |                                                   |                                              |                                     |
| <b>NGA subtest comprehension</b> |                        |                                     |                           |                                                           |                                                   |                                                   |                                              |                                     |
| Telerehabilitation group         | 47.6 (19.8)            | 59.3 (23.3)                         | 61.0 (24.0)               | 11.5 (7.6 – 15.3)                                         | 13.5 (7.9 – 19.1)                                 | -4.2 (-9.8 – 1.4)                                 | -4.0 (-12.0 – 4.1)                           | 0.324                               |
| Control group                    | 52.8 (24.0)            | 59.2 (28.5)                         | 61.5 (29.5)               |                                                           |                                                   |                                                   |                                              |                                     |
| <b>VAST intransitive verbs</b>   |                        |                                     |                           |                                                           |                                                   |                                                   |                                              |                                     |
| Telerehabilitation group         | 4.2 (3.2)              | 6.0 (3.5)                           | 6.8 (3.2)                 | 1.8 (1.1 – 2.6)                                           | 2.5 (1.7 – 3.3)                                   | -1.8 (-2.9 – -0.8)                                | -1.8 (-2.9 – -0.6)                           | <b>0.004</b>                        |
| Control group                    | 5.3 (3.2)              | 5.3 (3.4)                           | 6.1 (3.4)                 |                                                           |                                                   |                                                   |                                              |                                     |
| <b>VAST transitive verbs</b>     |                        |                                     |                           |                                                           |                                                   |                                                   |                                              |                                     |
| Telerehabilitation group         | 3.4 (3.0)              | 4.8 (3.7)                           | 5.8 (3.4)                 | 1.3 (0.7 – 1.9)                                           | 2.2 (1.5 – 2.9)                                   | -1.2 (-2.1 – -0.3)                                | -1.3 (-2.2 – -0.3)                           | <b>0.017</b>                        |
| Control group                    | 4.4 (3.7)              | 4.6 (3.9)                           | 5.4 (3.8)                 |                                                           |                                                   |                                                   |                                              |                                     |
| <b>VAST total score</b>          |                        |                                     |                           |                                                           |                                                   |                                                   |                                              |                                     |
| Telerehabilitation group         | 7.5 (6.0)              | 10.7 (6.9)                          | 12.5 (6.4)                | 3.1 (2.0 – 4.3)                                           | 4.6 (3.3 – 6.0)                                   | -3.0 (-4.7 – -1.4)                                | -3.0 (-4.9 – -1.1)                           | <b>0.002</b>                        |
| Control group                    | 9.7 (6.7)              | 9.9 (7.2)                           | 11.5 (7.0)                |                                                           |                                                   |                                                   |                                              |                                     |

NGA = Norwegian Basic Aphasia Assessment

VAST= Verb and Sentence Test, subtest sentence production

FU= Follow-up assessment

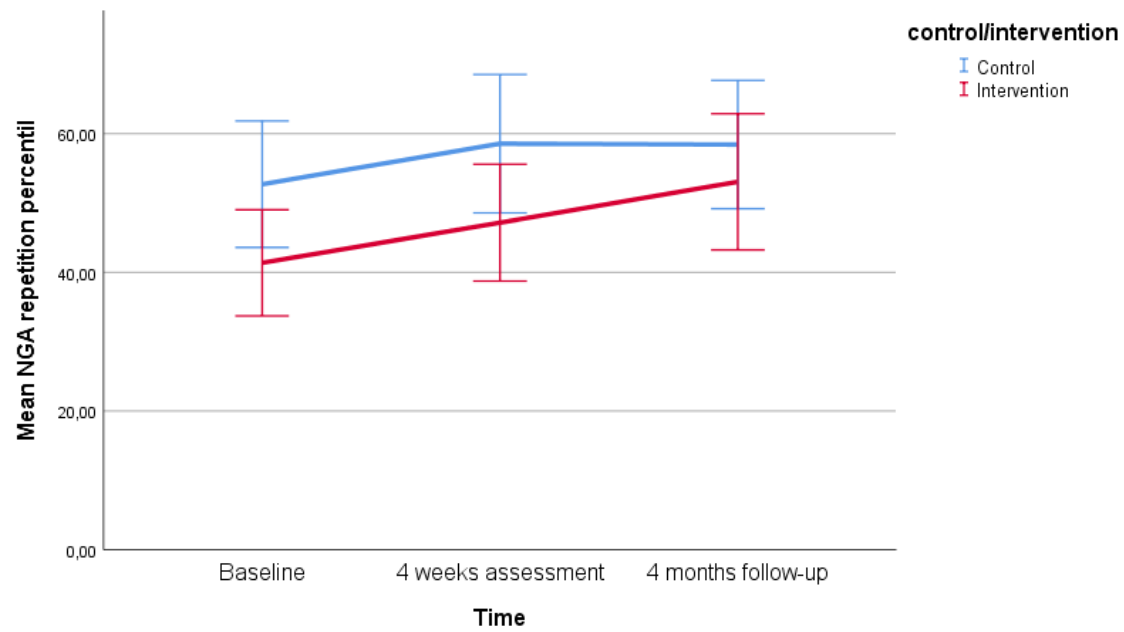

**Figure S1:** Multiple Line Mean of NGA repetition percentile by Time by control/intervention

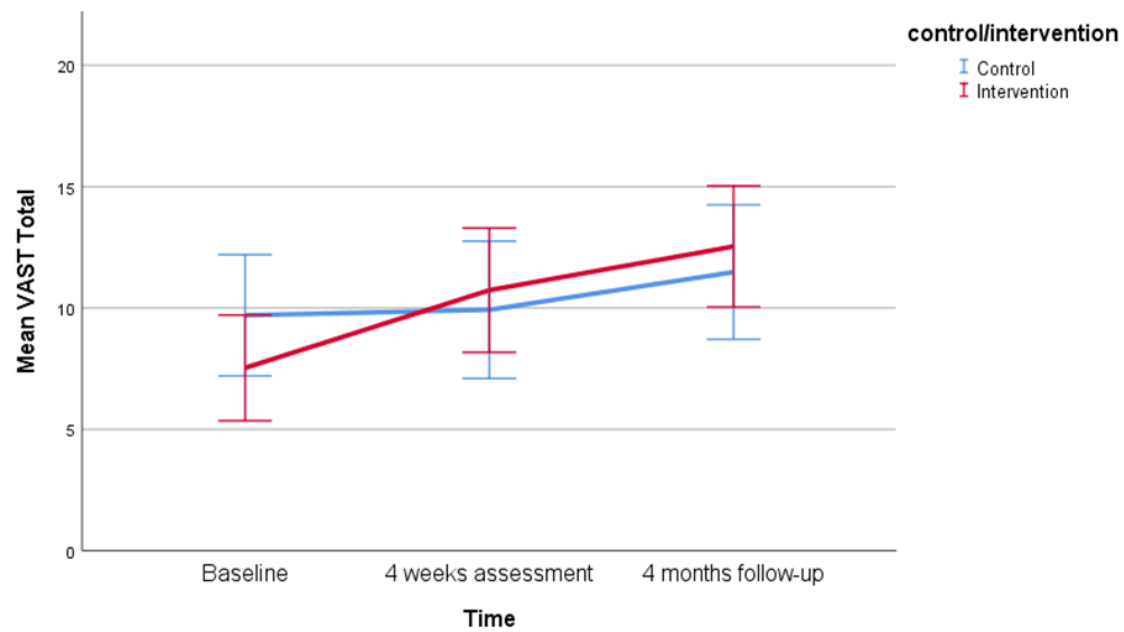

**Figure S2:** Multiple Line Mean of VAST Total by Time by control/intervention
